# Supplementary material for: Comparative effectiveness of hyaluronic acid, platelet-rich plasma, and platelet-rich fibrin in treating temporomandibular disorders: a systematic review and network meta-analysis
Source: PubMed Central journal article supplement (PMC10463486; doi:10.1186/s13005-023-00369-y), 2023-08-26
Supplement: 13005_2023_369_MOESM3_ESM.pdf [file 13005_2023_369_MOESM3_ESM.pdf]

### Additional file 3

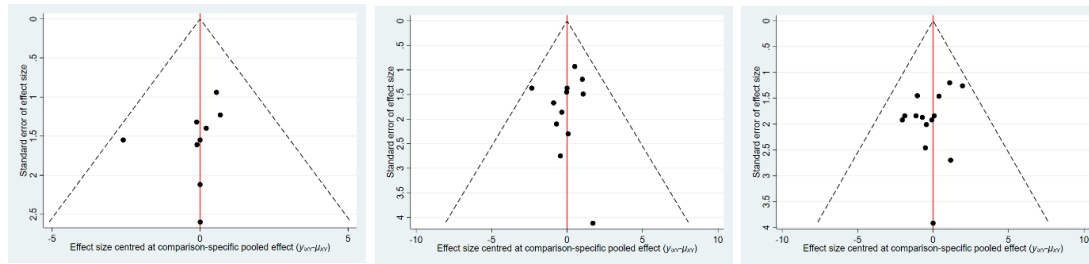

(A) The funnel plot about pain after one month, three months and six months treatment.

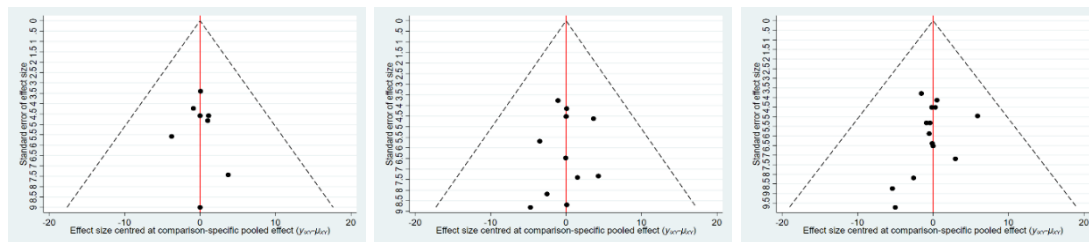

(B) The funnel plot about MMO after one month, three months and six months treatment.  
MMO: maximum mouth opening.
